# Supplementary material
Source: PubMed Central journal article supplement (PMC8173769)

# Place of Death for Individuals With Chronic Lung Disease

## Trends and Associated Factors From 2003 to 2017 in the United States

*Sarah H. Cross, MSW, MPH; E. Wesley Ely, MD, MPH; Dio Kavalieratos, PhD; James A. Tulsky, MD; and Haider J. Warraich, MD*

CHEST 2020; 158(2):670-680

*Online supplements are not copyedited prior to posting and the author(s) take full responsibility for the accuracy of all data.*

© 2020 AMERICAN COLLEGE OF CHEST PHYSICIANS. Reproduction of this article is prohibited without written permission from the American College of Chest Physicians. See online for more details. DOI: 10.1016/j.chest.2020.02.062

**e-Figure 1. Trends in place of death by census region (2003-2017)**

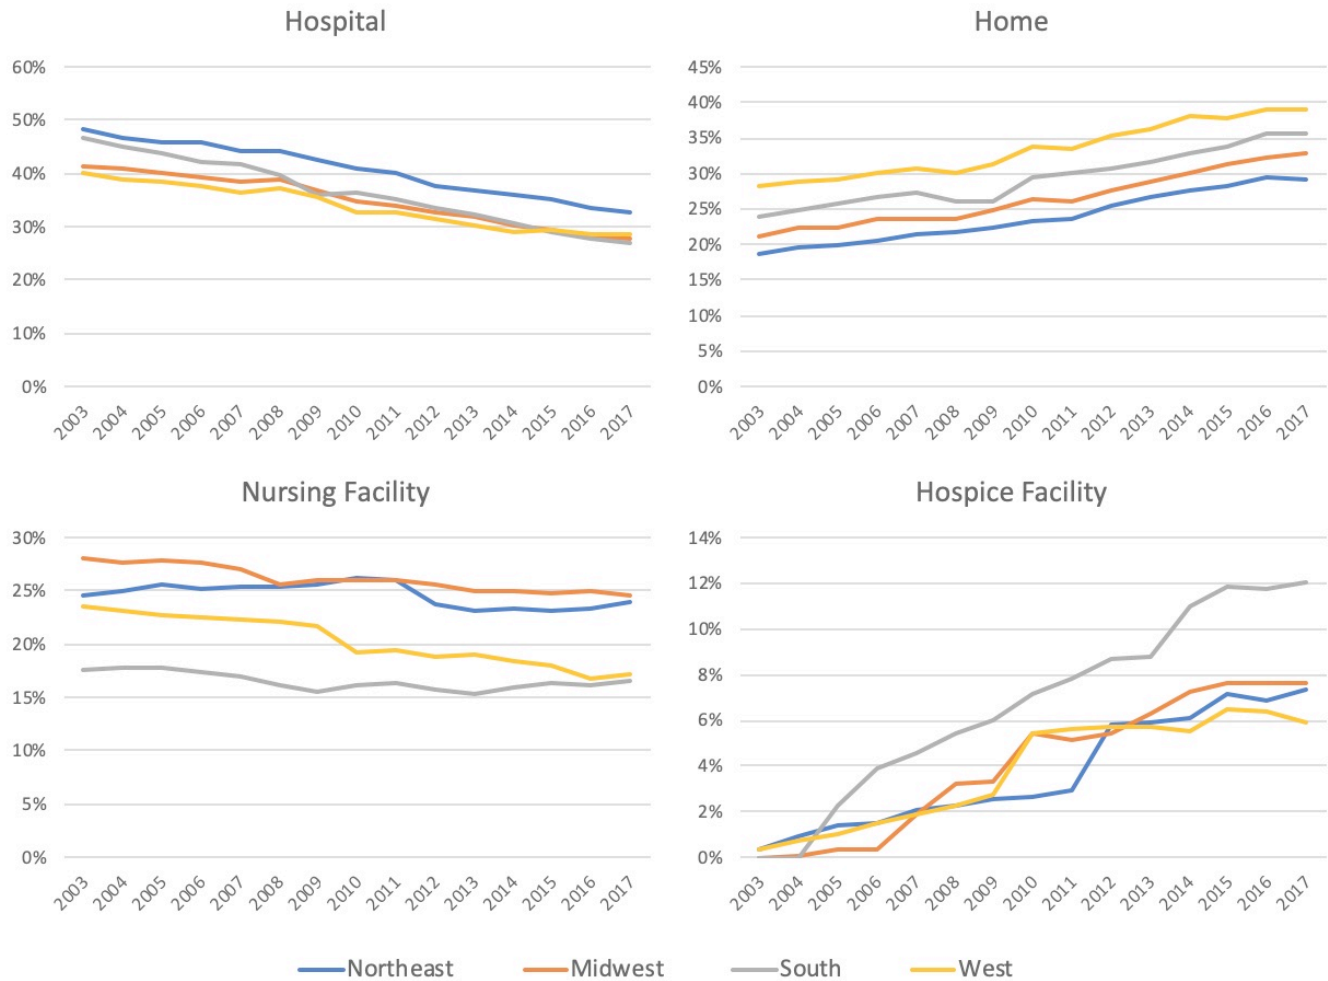

**e-Figure 2. Trends in place of death by urbanization (2003-2017)**

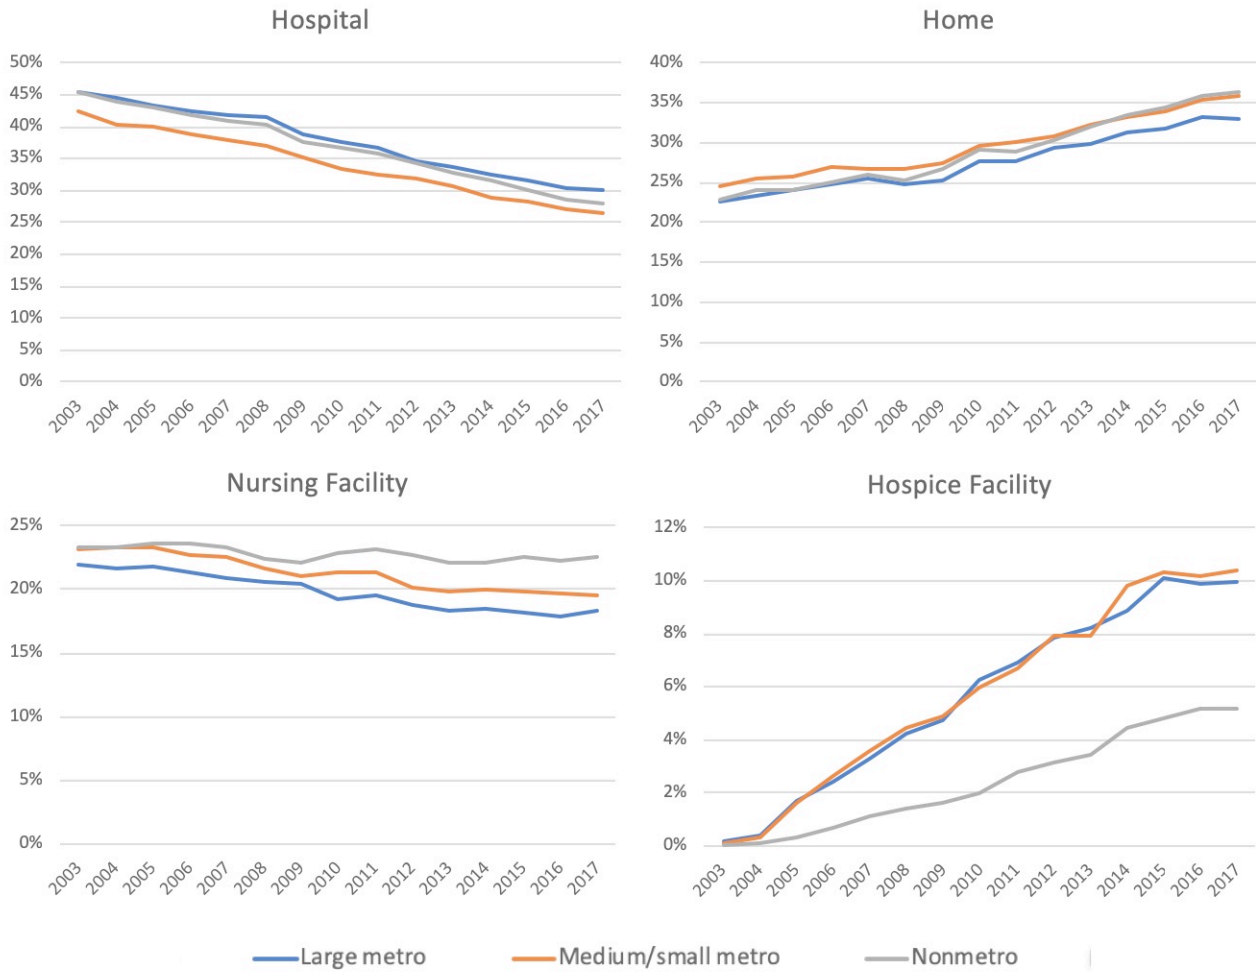

Supplement: mmc1.pdf [file mmc1.pdf]
